1 **Temporal dynamics of QTL effects on vegetative growth in *Arabidopsis thaliana***

2

3 Rhonda C. Meyer<sup>1\*</sup>, Kathleen Weigelt-Fischer<sup>1\*</sup>, Dominic Knoch<sup>1</sup>, Marc Heuermann<sup>1</sup>,  
4 Yusheng Zhao<sup>2</sup>, Thomas Altmann<sup>1</sup>

5

6 <sup>1</sup> Leibniz Institute of Plant Genetics and Crop Plant Research (IPK), Department of Molecular  
7 Genetics, Research Group Heterosis, OT Gatersleben, Corrensstraße 3, 06466 Seeland,  
8 Germany

9 <sup>2</sup> Leibniz Institute of Plant Genetics and Crop Plant Research (IPK), Department of Breeding  
10 Research, Research Group Quantitative Genetics, OT Gatersleben, Corrensstraße 3, 06466  
11 Seeland, Germany

12

13

14 Corresponding author: Rhonda C. Meyer

15 Email: [meyer@ipk-gatersleben.de](mailto:meyer@ipk-gatersleben.de)

16 Tel.: +49 (0)39482 5257

17 Fax: +49 (0)39482 5785

18

19

20 \* Both authors contributed equally.

21

22

23 Number of tables: 2                      Supplementary figures: 4

24 Number of figures: 4                      Supplementary data files: 6

25 Word count: 5173

26

27 Date of submission: 11.06.2020

28

29 **Running Title:** Dynamic growth QTL in Arabidopsis

30

31

1 **Highlight:** A genome-wide association study including the factor time highlighted that early  
2 plant growth in *Arabidopsis* is governed by several medium and many small effect loci, most  
3 of which act only during short phases of two to nine days.

4

5

## 6 **ABSTRACT**

7 We assessed early vegetative growth in a population of 382 accessions of *Arabidopsis*  
8 *thaliana* using automated non-invasive high-throughput phenotyping. All accessions were  
9 imaged daily from seven to 18 days after sowing in three independent experiments and  
10 genotyped using the Affymetrix 250k SNP array. Projected leaf area (PLA) was derived from  
11 image analysis and used to calculate relative growth rates (RGR). In addition, initial seed size  
12 was determined. The generated data sets were used jointly for a genome-wide association  
13 study that identified 238 marker-trait associations (MTAs) individually explaining up to 8 %  
14 of the total phenotypic variation. Co-localisation of MTAs occurred at 33 genomic positions.  
15 At 21 of these positions, sequential co-localisation of MTAs for two to nine consecutive days  
16 was observed. The detected MTAs for PLA and RGR could be grouped according to their  
17 temporal expression patterns, emphasising that temporal variation of MTA action can be  
18 observed even during the vegetative growth phase, a period of continuous formation and  
19 enlargement of seemingly similar rosette leaves. This indicates that causal genes may be  
20 differentially expressed in successive periods. Analyses of the temporal dynamics of  
21 biological processes are needed to gain important insight into the molecular mechanisms of  
22 growth-controlling processes in plants.

23

24

25

## 26 **Keywords:**

27 *Arabidopsis thaliana*; biomass; growth dynamics; genome-wide association mapping;  
28 GWAS; high-throughput phenotyping; temporal resolution; vegetative growth

29

30

31

## 1 INTRODUCTION

2

3 Plant growth is a complex process integrating many genetic, metabolic and environmental  
4 factors at the level of cells, tissues, organs or whole plants. Growth in the model plant system  
5 *Arabidopsis thaliana* occurs in a sequence of distinct yet partially overlapping phases (Boyes  
6 *et al.*, 2001), germination, seedling establishment, vegetative growth with successive  
7 appearance of leaves and progressive development of the root system, floral transition,  
8 flowering, seed production, senescence, each of which may be initiated and controlled by a  
9 network of different processes and responses to environmental cues (Beemster *et al.*, 2005;  
10 Dubois *et al.*, 2017; Schippers, 2015; Silva *et al.*, 2016; Tisné *et al.*, 2008; Weng *et al.*, 2016).  
11 In this context, quantitative trait locus (QTL) mapping and genome-wide association analyses  
12 have often been applied to identify QTL/alleles for biomass and other growth-related traits.  
13 Examples include QTL for leaf area, growth rates and dry weight (El-Lithy *et al.*, 2004; Lisec  
14 *et al.*, 2008), for seed germination, seed longevity or seed dormancy (Clerkx *et al.*, 2004;  
15 Nguyen *et al.*, 2012), and for complex traits such as leaf shape (Juenger *et al.*, 2005), or  
16 epistatic QTL for shoot and root growth (Bouteillé *et al.*, 2012). In several cases, the genes  
17 underlying the QTL could be identified (Bentsink *et al.*, 2006; Coluccio *et al.*, 2010; Loudet  
18 *et al.*, 2005; Riewe *et al.*, 2016; Todesco *et al.*, 2010). However, growth analyses were often  
19 restricted to one or a few time points during the development and consequently detected  
20 mostly cumulative effects (Zhu, 1995). The establishment of automated non-invasive high-  
21 throughput phenotyping systems (Furbank and Tester, 2011) allowed in-depth studies of  
22 many aspects of plant growth in model and crop plants, including *Arabidopsis* (Dornbusch *et al.*,  
23 2012; Granier *et al.*, 2006; Lyu *et al.*, 2017; Tisné *et al.*, 2013), maize (Cabrera-Bosquet  
24 *et al.*, 2016; Junker *et al.*, 2015; Zhang *et al.*, 2017), rice (Al-Tamimi *et al.*, 2016; Campbell  
25 *et al.*, 2015; Schilling *et al.*, 2015), barley (Honsdorf *et al.*, 2014; Neumann *et al.*, 2017;  
26 Wang *et al.*, 2019a), pea (Humplík *et al.*, 2015), lentil (Muscolo *et al.*, 2015) and rapeseed  
27 (Fanourakis *et al.*, 2014; Kjaer and Ottosen, 2015; Pommerrenig *et al.*, 2018). In particular,  
28 these automated platforms enabled almost continuous monitoring of plant growth and  
29 development at many time points during development. In *Arabidopsis*, a genome wide  
30 association study (GWAS) of projected leaf area at 12 different time points, parameters  
31 derived from growth models, and final biomass data revealed time-specific and general QTL  
32 affecting plant growth (Bac-Molenaar *et al.*, 2015). Temporal patterns for growth and  
33 developmental traits have also been described for maize (Muraya *et al.*, 2017), barley  
34 (Neumann *et al.*, 2017), triticale (Liu *et al.*, 2014), wheat (Ren *et al.*, 2018), and rapeseed

1 (Knoch *et al.*, 2020; Wang *et al.*, 2015). Taken together, these findings clearly show a need  
2 for time-resolved analyses of plant growth to detect loci showing temporal restricted  
3 expression patterns. We applied daily automated imaging to a population of 382 natural  
4 *Arabidopsis* accessions and performed genome-wide association analyses throughout early  
5 vegetative phases to address the following questions: (i) Can we resolve dynamic, time-  
6 restricted contributions of loci for early growth by a time course analysis? (ii) Does initial  
7 seed size affect vegetative growth (iii) Can we draw links to known QTL and loci? (iv) Are  
8 we able to identify candidate genes underlying the observed marker-trait-associations?

9  
10

## 11 **MATERIALS AND METHODS**

12

### 13 **Plant materials and growth conditions**

14

15 The 382 *Arabidopsis* accessions (Table S1) were amplified together, and the number of  
16 siliques restricted to six per plant. Seeds from this amplification were sown in a controlled  
17 environment growth-chamber. After two days of stratification at 5°C in constant darkness,  
18 seeds were germinated and seedlings acclimated under a 16/8 h day/night regime with  
19 16/14°C, 75% relative humidity, and  $140 \pm 10 \mu\text{mol m}^{-2} \text{s}^{-1}$  light intensity for three days.  
20 Parameters were then adjusted to 20/18°C, 60/75% relative humidity and  $140 \pm 10 \mu\text{mol m}^{-2}$   
21  $\text{s}^{-1}$  photosynthetically active radiation (PAR) from Whitelux Plus metal halide lamps (Venture  
22 Lighting Europe Ltd., Rickmansworth, Hertfordshire, England) still under a 16/8 h day/night  
23 regime. 12-well trays with a well size of 38x38x78 mm, cut from QuickPot QP 96T trays  
24 (HerkuPlast, Ering, Germany), were filled with a mixture of 85% (v) red substrate 2  
25 (Klasmann-Deilmann GmbH, Geeste, Germany) and 15% (v) sand. Plants were watered with  
26 45 ml water at 7 and 9 days after sowing (DAS), and then every other day until 19 DAS with  
27 55 ml water, to maintain approximately 70% field capacity.

28 Plants were grown in three independent experiments over one year, arranged in a randomised  
29 complete block design with three replicates per experiment. Each replicate consisted of four  
30 individual plants grown in the same 12-well tray.

31

### 32 **Genotyping of accessions with 250K SNP chip**

33

1 As no public 250k SNP data (Horton *et al.*, 2012) were available for 64 Arabidopsis  
2 accessions, DNA of the missing accessions was hybridised to the Affymetrix 250K SNP  
3 Array (DNAVision, Charleroi, Belgium), and raw data subjected to the analysis pipeline  
4 established by Nordborg and colleagues (Atwell *et al.*, 2010). Distribution of SNPs across the  
5 genome was visualized using the SNP-density plot function of the R package ‘rMVP’, a  
6 Memory-efficient, Visualization-enhanced, and Parallel-accelerated tool for genome-wide  
7 association studies, with bin size set to 10,000 bp. The package is available at github:  
8 <https://github.com/XiaoleiLiuBio/rMVP>.

9 The Araport database (Hanlon *et al.*, 2015; Rosen *et al.*, 2014; [www.araport.org](http://www.araport.org)) and  
10 Polymorph1001 (1001GenomesConsortium, 2016; <http://tools.1001genomes.org/polymorph>)  
11 were used to classify SNPs in candidate genes.

12

### 13 **Population structure**

14

15 Population structure was analysed using the software package STRUCTURE, version 2.3.4  
16 (Pritchard *et al.*, 2000). Population clustering for K= 1 to 10 using the ‘admixture’ model was  
17 performed with a burn-in period of 50,000, 50,000 MCMC replications and five iterations per  
18 K. Two approaches were combined to determine the best value for K, L(K) as described by  
19 Rosenberg *et al.* (2001), and  $\Delta K$  introduced by Evanno *et al.* (2005).

20

### 21 **High-throughput non-invasive phenotyping**

22

23 We assessed vegetative growth of the 382 Arabidopsis accessions at 12 different time points  
24 during development using the IPK automated phenotyping facility for small plants (Junker *et al.*,  
25 *et al.*, 2015; <https://www.ipk-gatersleben.de/en/phenotyping>).

26 Plants were imaged daily between 7 and 18 days after sowing (DAS), and dry weight was  
27 determined at 20 DAS. The germination time was defined as the time of emergence of the  
28 cotyledons, and determined by manually scanning the top view fluorescent images taken from  
29 three days after sowing onwards. Projected leaf area (PLA) measurements were extracted  
30 from top view images in the visible light range using IAP (Klukas *et al.*, 2014) and used to  
31 calculate relative growth rates (RGRs) as in Eq.1 in overlapping three-day intervals.

32

33 (Eq.1) 
$$\text{RGR} = \frac{\ln(PLA_{t_2}) - \ln(PLA_{t_1})}{t_2 - t_1}$$

34

1 To measure seed size traits, 20 seeds per accession were fixed on an A4 sheet including a size  
2 standard and scanned with an Epson Expression 10000XL flatbed scanner (Seiko Epson  
3 Corporation, Suwa, Japan) at a resolution of 1200 dpi. Seed width, length and area were  
4 extracted using the custom program “Evaluator” (Meyer *et al.*, 2012). The Evaluator  
5 algorithm isolates the seed image from the background based on differences in pixel  
6 intensities, creates a contour boundary and counts the pixels inside the boundary as a measure  
7 of area. Length and width of each seed are determined based on the seed’s orientation.

8

## 9 **Statistical analyses**

10

11 Adjusted phenotypic means were extracted as best linear unbiased estimates (BLUEs) using  
12 the GenSTAT 17<sup>th</sup> Edition (VSNi, Hemphstead, UK) procedure REML and the following  
13 mixed linear model:

14

15 (Eq.2)  $y = \mu + \text{accession} + \text{germination} + \text{experiment/accession} +$   
16  $\text{experiment/replicate/block}.$

17

18 Plant genotypes (accession) were considered as fixed factor effects with days to emergence of  
19 cotyledons (germination proxy) as covariate. Combinatorial interactions between each set of  
20 experiments, replicates within the experiments and blocks (8 carriers moving together in the  
21 phenotyping facility) within the replicates were considered as random factor effects.

22 Broad-sense heritability was calculated using the same mixed linear model, but with genotype  
23 as random factor:

24

25 (Eq.3) 
$$H^2 = \frac{\sigma_G^2}{\sigma_G^2 + \frac{1}{n_E} \sigma_{G \times E}^2 + \frac{1}{n_0} \sigma_e^2}$$

26

27 where  $\sigma_g$  is the genetic variance (accessions),  $\sigma_{G \times E}$  is the variance of the experiment/accession  
28 interaction,  $\sigma_e$  is the error variance,  $n_E$  is the average number of experiments per accessions  
29 ( $n_E=3$ ), and  $n_0$  is the number of individual plants for each accession ( $n_0=36$ ; He *et al.*, 2016).

30 The following statistical analyses were performed in R version 3.4.4 software environment for  
31 statistical computing and graphics (RCoreTeam, 2018), and RStudio Version 1.1.383.

32 Pearson correlations and associated  $p$ -values were estimated using the function ‘rcorr’ from  
33 the R package ‘Hmisc’ (V 4.1.1, <https://cran.r-project.org/web/packages/Hmisc/index.html>).

1 GWAS was performed with 26 traits and 212,142 SNP markers using FarmCPU (Liu *et al.*,  
2 2016). Principal components (PCs) to adjust for population structure were extracted from the  
3 GAPIT output (Lipka *et al.*, 2012; Tang *et al.*, 2016). For each trait, QQ plots were inspected  
4 to choose an appropriate number of PCs within the limits set by the STRUCTURE analysis  
5 (2-4 populations). The maxLoop parameter was increased to 30 and the optimal threshold for  
6  $p$ -value selection of the model in the first iteration was estimated by the  
7 FarmCPU.P.Threshold function with 1,000 permutations and set to 0.000085 for all traits.  
8 Subsequently,  $p$ -values of marker-trait-associations were adjusted for multiple comparisons  
9 using FDR (Benjamini and Hochberg, 1995). Only associations with adjusted  $p$ -values below  
10 the FDR threshold of 0.05 were included in further analyses. The phenotypic variance  
11 explained (PVE%) by a significant marker was estimated in R as described in Knoch *et al.*  
12 (2020).

13 Linkage disequilibrium (LD) was individually measured for each chromosome as  $r^2$ , the  
14 square of the allelic correlation coefficient of the pairwise physical distance between the  
15 109,178 homozygous SNP markers with the R package *LDheatmap* (Shin *et al.*, 2006). A  
16 modified equation (Marroni *et al.*, 2011; Remington *et al.*, 2001) based on expectations for  $r^2$   
17 (Hill and Weir, 1988) was used to estimate the decay of  $r^2$  with distance implemented in R:

18  
19 (Eq.4) 
$$E(r^2) = \left[ \frac{10+c}{(2+c)(11+c)} \right] \left[ 1 + \frac{(3+c)(12+12c+c^2)}{n(2+c)(11+c)} \right]$$

20  
21 where  $n$  is the effective population size (764 gametes of 382 individuals) and  $c$  is the  
22 recombination fraction between sites and  $C = 4nc$ . The arbitrary  $C$  is estimated fitting a  
23 nonlinear model using the `nls` function in R and starting with  $C = 0.1$ . The estimated  $C$  is then  
24 refitted into the equation to model adjusted LD values aligned for their Euclidian distance  
25 along the chromosome. The intercept of the half maximum adjusted LD with the Euclidian  
26 pairwise distance between SNPs was the half LD decay value of the population.

27 To estimate the degree of random co-localisation, permutation analyses were performed,  
28 distributing the detected associations randomly to all markers and extracting the number of  
29 co-localisations. This procedure was repeated 100,000 times.

30

31

## 32 **RESULTS**

33

### 34 **Description of the mapping population**

1  
2 The 382 accessions were selected to represent a wide geographic distribution (Fig. S1), with a  
3 focus on accessions for which public 250K SNP data were available (Atwell *et al.*, 2010).  
4 Hundred and one of these accessions were previously analysed in a nitrogen use efficiency  
5 study (Kuhlmann *et al.*, 2020). For 64 accessions no public SNP data were available at the  
6 time. DNA of the missing accessions was extracted and hybridised to the Affymetrix 250K  
7 SNP Array. The raw data were subjected to the analysis pipeline established by Nordborg and  
8 colleagues (Atwell *et al.*, 2010). The total number of 214,052 identified SNPs (call method  
9 75; (Horton *et al.*, 2012) was reduced to 212,142 SNPs by filtering for a minor allele  
10 frequency above 2% and missing values below 5% for use in GWAS. The SNP density plot  
11 (Fig. 1) reveals an even distribution of the markers across the genome. Overall population  
12 structure was low, with the first ten principal components (PCs) yielding a cumulative  $R^2$  of  
13 only 16.16% (3.67, 2.31, 2.02, 1.74, 1.33, 1.28, 1.07, 0.97, 0.95, 0.83 %, respectively). The  
14 mean Ln probability (L(K)) and the mean difference between successive likelihood values of  
15 K ( $\Delta K$ ) derived from the STRUCTURE output indicated an optimum K, i.e. number of  
16 subpopulations, between 2 and 4 (Fig. S2). The genome-wide half maximum LD decay was  
17 found to occur at a pairwise physical SNP distance of 3.37 kb. LD decay was also determined  
18 for each chromosome separately and amounted to 2.91 kb, 4.26 kb, 3.13 kb, 3.11 kb, and  
19 3.82 kb for chromosomes 1 to 5, respectively.

20

## 21 **Analysis of traits**

22

23 Between 7 and 18 days after sowing (DAS), plants were phenotyped on a daily basis using top  
24 view visible light images. Best linear unbiased estimates (BLUEs) of projected leaf area  
25 (PLA) and relative growth rates (RGR) were obtained using a mixed linear model (Eq. 2).  
26 Three models were evaluated, all of which contained accession (genotype) as fixed factor:  
27 model 1 incorporated the day of emergence of the cotyledons (proxy for germination) as a  
28 covariate to account for different germination time points (3-7 DAS); model 2 included the  
29 seed size as covariate in the fixed model, and model 3 included both germination and seed  
30 size. Only germination showed a significant effect, and therefore model 1 with accession as  
31 fixed factor and germination time as covariate was used to obtain adjusted mean values. The  
32 same model with accession as random factor was used to estimate broad-sense heritabilities of  
33 PLA and RGR (Table S2). Heritabilities were moderate to high, ranging from 66% for  
34 RGR15\_17 to 93% for seed area.



1 Pearson correlations were calculated between all phenotypic traits. The corresponding  
2 heatmap is presented in Fig. 2. The traits are clearly separated into three groups,  
3 corresponding to biomass (PLA and DW20), seed traits, and growth rates (RGR),  
4 respectively. Seed traits are positively correlated with PLA, and negatively with RGR, both at  
5 a low level. Correlations between PLA over time are all positive and highly significant. In  
6 contrast, correlation between RGRs over time are generally lower and switch from positive to  
7 negative during the late phase starting 14 DAS. This switch is even more pronounced in  
8 correlations between PLA and RGR.

9

## 10 **Genome-wide association study**

11

12 Genome-wide association studies (GWAS) were performed using the 26 phenotypic traits  
13 (dry biomass at 20DAS, PLA at 12 time points, RGR at 10 intervals, 3 seed traits) and  
14 212,142 SNPs in FarmCPU (Liu *et al.*, 2016). Correction for population structure was  
15 obtained by inclusion of the FarmCPU kinship matrix (Liu *et al.*, 2016), and in addition  
16 inclusion of principal components (PCs); the optimal number of PCs for each trait (Table S3)  
17 was selected based on QQ plots (Fig. S3). Overall, 238 significant ( $p\text{-value}_{(\text{FDR})} \leq 0.05$ )  
18 marker-trait associations (MTAs) were discovered, explaining between 0.1% and 8.1% of the  
19 estimated phenotypic variance (Table S3). Final biomass (dry weight at 20 DAS, DW20)  
20 resulted in 10 MTAs, while the time-resolved projected leaf area (PLA) yielded 111 MTAs,  
21 and the relative growth rates (RGR) 85 MTAs; 32 MTAs were found for seed traits (seed area  
22 SA, seed length SL, seed width SW). The next step consisted in a search for co-localisations;  
23 two MTAs were considered co-localised if they were positioned within the chromosome-  
24 specific LD decay threshold from each other. MTAs of different traits co-localised at 33  
25 positions (Table S3). In a permutation analysis with 100,000 repeats a maximum of 4 co-  
26 localisations per iteration was detected, consistent with the low number of detected  
27 associations ( $n=238$ ) in relation to the number of markers ( $n=212,142$ ).

28 MTAs for final biomass and leaf areas over time only shared three positions, no common  
29 MTAs were detected for final biomass and RGRs. Surprisingly, one co-localisation was found  
30 between seed area and RGR10\_12. To explore similarities between our results and QTL  
31 reported in the literature, with physical distances available (Bac-Molenaar *et al.*, 2015; El-  
32 Lithy *et al.*, 2004; Knoch *et al.*, 2017; Lisec *et al.*, 2008; Meyer *et al.*, 2010), we searched for  
33 co-localisations within a 10 kb interval around the SNP marker. The larger interval was  
34 chosen to harmonise our search with previous studies (Bac-Molenaar *et al.*, 2015; Kim *et al.*,

1 2007). MTAs co-localised (Table 1) at one position with a QTL for PLA extracted from Bac-  
2 Molenaar *et al.* (2015), at another position with a QTL for PLA identified by Meyer *et al.*  
3 (2010), and at three positions with metabolic QTL identified by Knoch *et al.* (2017) and Liseč  
4 *et al.* (2008). Two overlaps with known flowering genes were found (Table 1), one of which  
5 also coincides with the co-localised growth QTL of Bac-Molenaar *et al.* (2015).

6 We were particularly interested in the occurrence of growth MTAs over time, and  
7 investigated robust MTAs that were significant on at least two consecutive days. Overall,  
8 MTAs at 21 positions fulfilled this criterion, 15 PLA (Fig. 3A) and 6 RGR (Fig. 4A) loci. At  
9 two dynamic PLA loci, a MTA for RGR15-17 also co-localised, while a MTA for PLA12 co-  
10 localised at one dynamic RGR locus, but with reverse effect (Fig. 3B). A reversal of effects  
11 over time occurred in dynamic MTAs for RGR (Fig. 4B) only. Interestingly, one dynamic  
12 MTA for PLA coincided with a QTL previously described for metabolites in leaves (Liseč *et*  
13 *al.*, 2008) and seeds (Knoch *et al.*, 2017; Fig. S4).

14 The dynamic MTAs were only significant during restricted periods ranging from two to nine  
15 days (Fig. S4), none were significant over the whole time (12 days). For PLA, we found three  
16 early QTL, two early/intermediate QTL, two early/intermediate/late QTL, one intermediate  
17 QTL, four intermediate/late QTL, two late and one QTL with breaks between the early,  
18 intermediate and late phases (Fig. S4). For RGR we detected one early QTL, one  
19 early/intermediate QTL, two intermediate/late QTL and two late QTL (Fig. S4).

20 In the next step we looked for genes situated within the respective chromosome LD decay  
21 interval of each significant marker. In total we found 78 genes in or immediately adjacent to  
22 the MTA region, encoding one miRNA, three t-RNAs, five long non-coding RNAs, ten  
23 transposable elements and 59 genes encoding (putative) proteins (Table S4). Four significant  
24 markers associated with protein-coding genes (AT1G07680, AT1G60750, AT2G30690,  
25 AT3G07020) directly caused non-synonymous changes.

26

## 27 **Candidate genes**

28

29 The confidence intervals around sixteen MTAs contained a total of 30 genes annotated to be  
30 involved in growth, cell wall, signalling, or transcription regulation (Table S5), with up to five  
31 genes in an interval. Additional SNPs and small insertions/deletions (indels) were identified in  
32 the candidate genes using the 250K SNP array data (Horton *et al.*, 2012), Araport JBROWSE  
33 (Krishnakumar *et al.*, 2015) and Polymorph 1001 (1001GenomesConsortium, 2016), yielding  
34 1133 SNPs with high or moderate impact in the coding, promoter or UTR regions of 22 of

1 these candidate genes (Table S5). Further mining of available databases and literature for  
2 possible links to plant growth led to a reduced list of nine most promising candidate genes for  
3 seven dynamic MTAs (Table 2).

## 6 **DISCUSSION**

8 Unravelling the genetic basis of complex traits governing plant performance and discovering  
9 the underlying molecular mechanisms remains a major undertaking in plant biology. The  
10 main aim of this study was the identification of genetic factors that influence early vegetative  
11 growth in *Arabidopsis* over a period of 12 days (7 to 18 DAS). We applied daily automated  
12 high-throughput phenotyping in the IPK phenotyping platform for small plants (Junker et al.,  
13 2015) to a diverse collection of 382 *Arabidopsis thaliana* accessions, extracted data for  
14 projected leaf area (PLA) at 12 time points, and calculated relative growth rates based on  
15 PLA. Previous studies have demonstrated that in *Arabidopsis*, biomass is highly correlated  
16 with leaf area (Leister *et al.*, 1999; Meyer *et al.*, 2004), enabling us to use PLA as a proxy for  
17 biomass.

18 Hierarchical clustering of the phenotypic data revealed a separation between  
19 early/intermediate (7 – 14) and late (15-18) phases. One possible explanation may be the  
20 increasing overlap of leaves, and therefore underestimation of PLA, at the later stages. It may  
21 also reflect morphological differences between leaves appearing at different stages  
22 (heteroblasty; Berardini *et al.*, 2001). Similarly, the pronounced switches in correlations  
23 between PLA and RGR may indicate distinct growth phases, in particular floral transition in  
24 the shoot apical meristem (SAM). The transition from vegetative to reproductive SAM is  
25 terminal in the annual *Arabidopsis*, occurs before any visible sign of flowering and slows  
26 down vegetative leaf growth (Cookson *et al.*, 2007). In our long-day conditions, some  
27 accessions started bolting as early as 18 days after sowing. Another possibility is a link to the  
28 appearance of leaves, as speculated for rapeseed (Knoch *et al.*, 2020).

29 For all analysed time points, a total of 236 associations with endpoint biomass, the 22 growth-  
30 related and the three seed traits were detected at  $p\text{-value}_{(\text{FDR})} \leq 0.05$ . Most of the detected  
31 MTAs explained only a small percentage of phenotypic variance ( $< 5$  PVE%, Table S3). In  
32 total, only 9 (3.8 %) MTAs with larger effects ( $> 5$  PVE%) were detected, similar to a study  
33 in rapeseed (Knoch *et al.*, 2020), confirming that plant growth results from the cumulative  
34 effects of the interaction of numerous small effect genes. We found a surprisingly large

1 number of associations for RGR, individually explaining up to 8% phenotypic variance, the  
2 highest value found in this study. Robust phenotypic values obtained by calculating RGR over  
3 rolling 3-day intervals certainly contributed to the successful GWAS.

4 Several MTAs co-localised with previously described QTL, with the caveat that physical  
5 marker positions are only available for a restricted number of studies. This is particularly true  
6 for flowering time, where only eight QTL were available for comparison (Alonso-Blanco *et al.*,  
7 1998; Clarke *et al.*, 1995); therefore known flowering genes (Sasaki *et al.*, 2018; Srikanth  
8 and Schmid, 2011; Wellmer and Riechmann, 2010) were also included. The flowering time  
9 gene *PFT1* (*AT1G25540*, (Cerdán and Chory, 2003) co-localising with MTA1-05 for RGR09-  
10 11 is also involved in the control of organ size (Xu and Li, 2011) and the transcriptional  
11 regulation of genes involved in cell elongation and cell wall composition (Seguela-Arnaud *et al.*,  
12 2015). The flowering time gene *AT3G19500* encodes a bHLH DNA-binding superfamily  
13 protein that is part of the genetic network underlying flowering time regulation; its expression  
14 is positively correlated with flowering time, and negatively correlated with the expression of  
15 *FLC* (Sasaki *et al.*, 2018). This gene mapped to the same region as MTA3-08 for PLA15 from  
16 this study, and MTA 3/6.8 for PLA18 identified by Bac-Molenaar *et al.* (2015). According to  
17 their experimental set-up, plants were transferred from stratification 4, 5, or 6 days after  
18 sowing, and this day was counted as day 1, therefore their PLA18 corresponds to PLA at 22-  
19 24 days after sowing. Despite 244 common accessions, this is the only shared MTA between  
20 these two growth studies, most likely due to different growth conditions and measurement at  
21 different time points. A large influence of even slightly different growth conditions was  
22 demonstrated in a comparison of the growth of three *Arabidopsis* accessions across ten  
23 laboratories (Massonnet *et al.*, 2010). Therefore, the influence on growth of candidate genes  
24 located in this MTA is potentially stable across various environmental conditions.

25 The co-localisation between MTAs for seed area and RGR10\_12 was unexpected, as seed  
26 area displayed no significant effect in the mixed linear analysis. Seed size has been shown to  
27 influence early vegetative growth in *Arabidopsis* (Elwell *et al.*, 2011; Meyer *et al.*, 2004), but  
28 this effect can be neutralised by restricting the number of siliques per plant (Meyer *et al.*,  
29 2004). However, the shared MTA region contains *AtWRINKLED3* (*AT1G16060*), which  
30 encodes an AP2-domain protein that interacts with a positive regulator of the ABA response  
31 (*ARIA*) and is involved in regulating seedling growth (Lee *et al.*, 2009). Conversely, ABA  
32 has been shown to be involved in endosperm development (Cheng *et al.*, 2014), and seed size  
33 is at least partially determined by endosperm growth (Sun *et al.*, 2010). The observed link  
34 may well reflect different actions of the same gene during different developmental phases.

1 Similarly, the co-localisation of a QTL for seed proline content (Knoch *et al.*, 2017) with  
2 MTAs for PLA between 13 and 18 DAS and dry weight at 20 DAS may be due to the  
3 influence of parental seed composition on growth and development of the next generation  
4 (Alonso-Blanco *et al.*, 1999; Elwell *et al.*, 2011). In early studies in wheat, seed proline  
5 content was positively correlated with seedling growth (Lowe *et al.*, 1972). Proline has been  
6 associated with general stress tolerance (Ashraf and Foolad, 2007); it accumulates in maturing  
7 *Arabidopsis* seeds (Chiang and Dandekar, 1995) where it seems essential for embryo  
8 development (Funk *et al.*, 2012) and stimulates *Arabidopsis* germination (Hare *et al.*, 2003).  
9 Given these findings, it is conceivable that differences in seed proline content may translate  
10 into growth differences. The associated candidate gene *At5g04275* encodes miRNA172,  
11 which has been implicated in early vegetative development in *Arabidopsis* (Martin *et al.*,  
12 2010) and in proline accumulation under drought stress in potato (Yang *et al.*, 2013), and  
13 which shows higher abundance in fast growing *Arabidopsis* mutants overexpressing purple  
14 acid phosphatase 2 (Liang *et al.*, 2014).

15 The daily imaging performed during the phenotyping experiments allowed the analysis of the  
16 temporal dynamics of detected growth QTL. To address robust associations, only MTAs  
17 significant at two consecutive time points were considered for a detailed analysis. A total of  
18 21 of these associations were detected, 15 for projected leaf area and six for relative growth  
19 rate. The elucidation of growth dynamics by means of time-dependent QTL analysis has been  
20 addressed in several studies in model and crop plant species, including *Arabidopsis* (Bac-  
21 Molenaar *et al.*, 2016; Bac-Molenaar *et al.*, 2015; Marchadier *et al.*, 2019; Meyer *et al.*,  
22 2010), *Setaria* (Feldman *et al.*, 2017), rice (Al-Tamimi *et al.*, 2016; Campbell *et al.*, 2017; Wu  
23 *et al.*, 2018), maize (Muraya *et al.*, 2017; Wang *et al.*, 2019b; Zhang *et al.*, 2017), barley  
24 (Neumann *et al.*, 2015; Pham *et al.*, 2019), rye (Miedaner *et al.*, 2018; Würschum *et al.*, 2014)  
25 and rapeseed (Knoch *et al.*, 2020; Wang *et al.*, 2015), with phenotyping frequencies varying  
26 from daily to weekly. The high temporal resolution provided by the present study coupled to  
27 the advantages of the *Arabidopsis* model system (small plant size, small and annotated  
28 genome, plethora of publicly available genetic and genomic resources) and the fast LD decay  
29 in our population facilitate the identification of putative candidate genes. In concordance with  
30 a previous genome-wide association study in *Arabidopsis* (Bac-Molenaar *et al.*, 2015), we  
31 detected only period-specific MTAs affecting growth, and none significant over the whole  
32 time. Only three MTAs for endpoint biomass (DW20) co-localised with sequential MTAs for  
33 PLA, all in the intermediate to late phase; none overlapped with MTAs for RGR. Similar  
34 observations were made during the analyses of plant growth dynamics in maize (Muraya *et*

1 *al.*, 2017) and rapeseed (Knoch *et al.*, 2020). Determining only endpoint biomass for input in  
2 a GWAS therefore severely limits the number of growth controlling genetic factors that can  
3 be detected.

4 Of the 59 putative protein-encoding genes located within dynamic MTA regions for PLA and  
5 RGR, eleven were annotated as encoding hypothetical proteins and another eleven genes  
6 could not be assigned a function. The remaining 37 genes were screened in available  
7 databases (Araport, TAIR, eFP Browser) and literature for possible links to plant growth,  
8 reducing the list to 30 candidate genes. Of these candidates, nine genes displayed relevant  
9 expression patterns (leaves, roots, seedlings) and/or mutant growth behaviour; three genes  
10 contained both deleterious and missense SNPs, six genes harboured only moderate effect  
11 SNPs in the coding region, promoter or UTRs. Moderate effect SNPs may be of particular  
12 interests in attempts to identify alleles modulating the growth performance, without the  
13 possible pleiotropic effects caused by gene disruption. The low number of genes in the MTA  
14 regions should facilitate validation using time- and tissue-resolved expression analyses.

15 *AtECA4* (AT1G07670) encoding an endomembrane-type CA-ATPase 4 is a possible  
16 candidate within MTA1.1 for PLA10-14. Nguyen *et al.* (2018) showed that *AtECA4* is  
17 involved in the recycling of endocytosed cargo proteins such as ABCG25 and BRI1 from the  
18 trans-Golgi network/early endosome to the plasma membrane. This process has been  
19 described to be crucial to regulate homeostasis of the cellular ABA levels, and brassinolide  
20 (BL)-mediated signalling for growth. Mutant *eca4* plants showed multiple phenotypes  
21 including enhanced ABA sensitivity, increased resistance to dehydration and NaCl stresses,  
22 and more robust vegetative growth of shoots and roots. Candidate gene AT1G60790 (*AtTBL2*)  
23 is located within MTA1-03 for RGR08-11, belongs to the ‘trichome birefringence like’ (TBL)  
24 gene family with 46 members in Arabidopsis and clusters in the same clade as *TBR*, *TBL1* and  
25 *TBL4* (Gao *et al.*, 2017). *TBR* (AT5G06700) and *TBL29/ESK1* (AT3G55990) are involved in  
26 cell wall biogenesis and modification with mutants showing impaired growth (Bischoff *et al.*,  
27 2010; Lefebvre *et al.*, 2011; Xiong *et al.*, 2013). In rice, trichome birefringence-like (*tbl*)  
28 mutants affected in xylan *O*-acetylation displayed a stunted growth phenotype (Gao *et al.*,  
29 2017). The MTA3-01 region for RGR15-18 contained two possible candidate genes:  
30 AT3G07020 and AT3G07030. AT3G07020 encodes an UDP-glucose:sterol  
31 glucosyltransferase, 80 UGT80A2, that is required for steryl glycosides and acyl steryl  
32 glycosides, and mutant *ugt80A2* seedlings have been described to show reduced root growth,  
33 with overall minor effects on plant growth (DeBolt *et al.*, 2009), and a lower seed mass  
34 (Stucky *et al.*, 2014). The second gene, AT3G07030, encodes an ALBA DNA/RNA-binding

1 protein potentially involved in transcription regulation (Goyal *et al.*, 2016). In Arabidopsis,  
2 ALBA proteins have been associated with rhizoid and root hair growth, with mutants *alba1*  
3 and *alba2* displaying reduced elongation (Honkanen *et al.*, 2016). *AtXTH16* (AT3G23730) is  
4 the most likely candidate for MTA3-06 (PLA12-16). XTH16 is a xyloglucan  
5 endotransglucosylase/hydrolase 16, potentially involved in cell wall modifications  
6 (Sasidharan *et al.*, 2010). Recent studies revealed that the expression of *AtXTH16* is GA-  
7 induced and *PKL*-dependent and correlates with larger plants (Park *et al.*, 2017). Among the  
8 three genes within the MTA3-07 region for PLA12-20, AT2G49380 (*iqd15*) belongs to one of  
9 the plant-specific IQD families that have been described as scaffold-like proteins containing  
10 the IQ67 calmodulin binding domain that may link CaM-dependent Ca<sup>2+</sup> signalling to cell  
11 function, shape, and growth (Bürstenbinder *et al.*, 2017). Another possible candidate could be  
12 the cytokinin responsive gene AT3G49390 (*CID10*); however, T-DNA insertion mutants did  
13 not show an altered growth phenotype (Bravo *et al.*, 2005). AT4G13620, adjacent to the  
14 MTA4-03 region (PLA14-15), encodes the ethylene-responsive transcription factor ERF062  
15 belonging to the DREB subgroup A6 within the ERF/AP2 transcription factor superfamily  
16 (Weber and Hellmann, 2009), and has been shown to be nitrate responsive (Menz *et al.*,  
17 2016).

18 The functional diversity of the candidate genes identified in this study is yet another reminder  
19 of the complexity of plant growth, which necessitates the coordinated action of a large  
20 number of genes active at different time points during development.

21

## 22 CONCLUSIONS

23

24 In this study we analysed the early growth of a diversity population of Arabidopsis accessions  
25 using high-throughput phenotyping at a high temporal resolution, and detected both single  
26 timepoint (general) and multiple timepoint (dynamic) MTAs. The inspection of the genes  
27 located in the MTA regions delivered potential targets for in-depth time-resolved functional  
28 analyses. The scarcity of shared QTL between endpoint biomass and PLA (proxy for  
29 biomass) or RGR over time illustrates the need for analyses of the temporal dynamics of  
30 biological processes to gain important insight into the molecular mechanisms of growth-  
31 controlling processes in plants.

32

33

## 34 ACKNOWLEDGMENTS

1

2 We thank Alexandra Rech, Iris Fischer, Monika Gottowik, Beatrice Knüpfer, Manuela  
3 Kretschmann, Marion Michaelis, Ingo Mücke and Gunda Wehrstedt for excellent technical  
4 assistance.

5 This research was supported through institutional funds of the Leibniz Institute of Plant  
6 Genetics and Crop Plant Research (IPK) and did not receive any specific grant from funding  
7 agencies in the public, commercial, or not-for-profit sectors.

8

9

## 10 **SUPPLEMENTARY DATA**

11 Table S1: Overview of accessions used in this study

12 Table S2: Adjusted means and broad sense heritability of phenotypic data

13 Table S3: Overview of the 238 detected MTAs

14 Table S4: Overview of the 79 genes in or adjacent to LD interval around significant marker

15 Table S5: List of 30 potential candidate genes

16 Figure S1: Geographic origin of the 382 analysed Arabidopsis accessions

17 Figure S2: Assessment of population structure

18 Figure S3: QQ plots with inclusion of PCs for population structure correction

19 Figure S4: Duration of dynamic MTA and co-localisation with known QTL

20

21

22

23



## REFERENCES

- 1001GenomesConsortium.** 2016. 1,135 genomes reveal the global pattern of polymorphism in *Arabidopsis thaliana*. *Cell* **166**, 481-491.
- Al-Tamimi N, Brien C, Oakey H, Berger B, Saade S, Ho YS, Schmöckel SM, Tester M, Negrão S.** 2016. Salinity tolerance loci revealed in rice using high-throughput non-invasive phenotyping. *Nature Communications* **7**, 13342.
- Alonso-Blanco C, Blankestijn-de Vries H, Hanhart CJ, Koornneef M.** 1999. Natural allelic variation at seed size loci in relation to other life history traits of *Arabidopsis thaliana* *Proceedings of the National Academy of Sciences of the United States of America* **96**, 4710-4717.
- Alonso-Blanco C, El-Assal SE, Coupland G, Koornneef M.** 1998. Analysis of natural allelic variation at flowering time loci in the Landsberg *erecta* and Cape Verde Islands ecotypes of *Arabidopsis thaliana* *Genetics* **149**, 749-764.
- Ashraf M, Foolad MR.** 2007. Roles of glycine betaine and proline in improving plant abiotic stress resistance. *Environmental and Experimental Botany* **59**, 206-216.
- Atwell S, Huang YS, Vilhjálmsson BJ, Willems G, Horton M, Li Y, Meng D, Platt A, Tarone AM, Hu TT, Jiang R, Mulyati NW, Zhang X, Amer MA, Baxter I, Brachi B, Chory J, Dean C, Debieu M, de Meaux J, Ecker JR, Faure N, Kniskern JM, Jones JDG, Michael T, Nemri A, Roux F, Salt DE, Tang C, Todesco M, Traw MB, Weigel D, Marjoram P, Borevitz JO, Bergelson J, Nordborg M.** 2010. Genome-wide association study of 107 phenotypes in a common set of *Arabidopsis thaliana* inbred lines. *Nature* **465**, 627-631.
- Bac-Molenaar JA, Granier C, Keurentjes JJB, Vreugdenhil D.** 2016. Genome-wide association mapping of time-dependent growth responses to moderate drought stress in *Arabidopsis*. *Plant, Cell & Environment* **39**, 88-102.
- Bac-Molenaar JA, Vreugdenhil D, Granier C, Keurentjes JJB.** 2015. Genome-wide association mapping of growth dynamics detects time-specific and general quantitative trait loci. *Journal of Experimental Botany* **66**, 5567-5580.
- Beemster GTS, De Veylder L, Vercruyse S, West G, Rombaut D, Van Hummelen P, Galichet A, Gruissem W, Inzé D, Vuylsteke M.** 2005. Genome-wide analysis of gene expression profiles associated with cell cycle transitions in growing organs of *Arabidopsis*. *Plant Physiology* **138**, 734-743.

- Bentsink L, Jowett J, Hanhart CJ, Koornneef M.** 2006. Cloning of *DOG1*, a quantitative trait locus controlling seed dormancy in *Arabidopsis*. Proceedings of the National Academy of Sciences of the United States of America **103**, 17042-17047.
- Berardini TZ, Bollman K, Sun H, Poethig RS.** 2001. Regulation of vegetative phase change in *Arabidopsis thaliana* by cyclophilin 40. Science **291**, 2405-2407.
- Bischoff V, Nita S, Neumetzler L, Schindelasch D, Urbain A, Eshed R, Persson S, Delmer D, Scheible W-R.** 2010. *TRICHOME BIREFRINGENCE* and Its Homolog *AT5G01360* Encode Plant-Specific DUF231 Proteins Required for Cellulose Biosynthesis in *Arabidopsis*. Plant Physiology **153**, 590-602.
- Bouteillé M, Rolland G, Balsera C, Loudet O, Muller B.** 2012. Disentangling the Intertwined Genetic Bases of Root and Shoot Growth in *Arabidopsis*. PLoS ONE **7**, e32319.
- Boyes DC, Zayed AM, Ascenzi R, McCaskill AJ, Hoffman NE, Davis KR, Gorlach J.** 2001. Growth stage-based phenotypic analysis of *Arabidopsis*: A model for high throughput functional genomics in plants. Plant Cell **13**, 1499-1510.
- Bravo J, Aguilar-Henonin L, Olmedo G, Guzman P.** 2005. Four distinct classes of proteins as interaction partners of the PABC domain of *Arabidopsis thaliana* Poly (A)-binding proteins. Molecular Genetics and Genomics **272**, 651-665.
- Bürstenbinder K, Mitra D, Quegwer J.** 2017. Functions of IQD proteins as hubs in cellular calcium and auxin signaling: A toolbox for shape formation and tissue-specification in plants? Plant Signaling & Behavior **12**, e1331198.
- Cabrera-Bosquet L, Fournier C, Bricchet N, Welcker C, Suard B, Tardieu F.** 2016. High-throughput estimation of incident light, light interception and radiation-use efficiency of thousands of plants in a phenotyping platform. New Phytologist **212**, 269-281.
- Campbell MT, Du Q, Liu K, Brien CJ, Berger B, Zhang C, Walia H.** 2017. A Comprehensive Image-based Phenomic Analysis Reveals the Complex Genetic Architecture of Shoot Growth Dynamics in Rice (*Oryza sativa*). The Plant Genome **10**, 1-14.
- Campbell MT, Knecht AC, Berger B, Brien CJ, Wang D, Walia H.** 2015. Integrating Image-Based Phenomics and Association Analysis to Dissect the Genetic Architecture of Temporal Salinity Responses in Rice. Plant Physiology **168**, 1476-1489.
- Cerdán PD, Chory J.** 2003. Regulation of flowering time by light quality. Nature **423**, 881-885.
- Cheng ZJ, Zhao XY, Shao XX, Wang F, Zhou C, Liu YG, Zhang Y, Zhang XS.** 2014. Abscisic Acid Regulates Early Seed Development in *Arabidopsis* by ABI5-Mediated Transcription of *SHORT HYPOCOTYL UNDER BLUE1*. Plant Cell **26**, 1053.

- Chiang HH, Dandekar AM.** 1995. Regulation of proline accumulation in *Arabidopsis thaliana* (L.) Heynh during development and in response to desiccation. *Plant, Cell & Environment* **18**, 1280-1290.
- Clarke JH, Mithen R, Brown JKM, Dean C.** 1995. QTL analysis of flowering time in *Arabidopsis thaliana*. *Molecular and General Genetics* **248**, 278-286.
- Clerkx EJM, El-Lithy ME, Vierling E, Ruys GJ, Blankestijn-De Vries H, Groot SPC, Vreugdenhil D, Koornneef M.** 2004. Analysis of Natural Allelic Variation of *Arabidopsis* Seed Germination and Seed Longevity Traits between the Accessions Landsberg *erecta* and Shakdara, Using a New Recombinant Inbred Line Population. *Plant Physiology* **135**, 432-443.
- Coluccio MP, Sanchez SE, Kasulin L, Yanovsky MJ, Botto JF.** 2010. Genetic mapping of natural variation in a shade avoidance response: *ELF3* is the candidate gene for a QTL in hypocotyl growth regulation. *Journal of Experimental Botany* **62**, 167-176.
- Cookson SJ, Chenu K, Granier C.** 2007. Day Length Affects the Dynamics of Leaf Expansion and Cellular Development in *Arabidopsis thaliana* Partially through Floral Transition Timing. *Annals of Botany* **99**, 703-711.
- DeBolt S, Scheible W-R, Schrick K, Auer M, Beisson F, Bischoff V, Bouvier-Navé P, Carroll A, Hematy K, Li Y.** 2009. Mutations in UDP-glucose: sterol glucosyltransferase in *Arabidopsis* cause transparent testa phenotype and suberization defect in seeds. *Plant Physiology* **151**, 78-87.
- Dornbusch T, Lorrain S, Kuznetsov D, Fortier A, Liechti R, Xenarios I, Fankhauser C.** 2012. Measuring the diurnal pattern of leaf hyponasty and growth in *Arabidopsis* – a novel phenotyping approach using laser scanning. *Functional Plant Biology* **39**, 860-869.
- Dubois M, Claeys H, Van den Broeck L, Inzé D.** 2017. Time of day determines *Arabidopsis* transcriptome and growth dynamics under mild drought. *Plant, Cell & Environment* **40**, 180-189.
- El-Lithy ME, Clerkx EJM, Ruys GJ, Koornneef M, Vreugdenhil D.** 2004. Quantitative trait locus analysis of growth-related traits in a new *Arabidopsis* recombinant inbred population. *Plant Physiology* **135**, 444-458.
- Elwell AL, Gronwall DS, Miller ND, Spalding EP, Durham Brooks TL.** 2011. Separating parental environment from seed size effects on next generation growth and development in *Arabidopsis*. *Plant, Cell & Environment* **34**, 291-301.
- Evanno G, Regnaut S, Goudet J.** 2005. Detecting the number of clusters of individuals using the software STRUCTURE: a simulation study. *Molecular Ecology* **14**, 2611-2620.

- Fanourakis D, Briese C, Max JFJ, Kleinen S, Putz A, Fiorani F, Ulbrich A, Schurr U.** 2014. Rapid determination of leaf area and plant height by using light curtain arrays in four species with contrasting shoot architecture. *Plant Methods* **10**, 9.
- Feldman MJ, Paul RE, Banan D, Barrett JF, Sebastian J, Yee M-C, Jiang H, Lipka AE, Brutnell TP, Dinneny JR.** 2017. Time dependent genetic analysis links field and controlled environment phenotypes in the model C4 grass *Setaria*. *PLoS Genetics* **13**, e1006841.
- Funck D, Winter G, Baumgarten L, Forlani G.** 2012. Requirement of proline synthesis during *Arabidopsis* reproductive development. *BMC Plant Biology* **12**, 191.
- Furbank RT, Tester M.** 2011. Phenomics – technologies to relieve the phenotyping bottleneck. *Trends in Plant Science* **16**, 635-644.
- Gao Y, He C, Zhang D, Liu X, Xu Z, Tian Y, Liu X-H, Zang S, Pauly M, Zhou Y.** 2017. Two trichome birefringence-like proteins mediate xylan acetylation, which is essential for leaf blight resistance in rice. *Plant Physiology* **173**, 470-481.
- Goyal M, Banerjee C, Nag S, Bandyopadhyay U.** 2016. The Alba protein family: Structure and function. *Biochimica Et Biophysica Acta (BBA)-Proteins and Proteomics* **1864**, 570-583.
- Granier C, Aguirrezabal L, Chenu K, Cookson SJ, Dauzat M, Hamard P, Thioux JJ, Rolland G, Bouchier Combaud S, Lebaudy A.** 2006. PHENOPSIS, an automated platform for reproducible phenotyping of plant responses to soil water deficit in *Arabidopsis thaliana* permitted the identification of an accession with low sensitivity to soil water deficit. *New Phytologist* **169**, 623-635.
- Hanlon MR, Vaughn M, Mock S, Dooley R, Moreira W, Stubbs J, Town C, Miller J, Krishnakumar V, Ferlanti E, Pence E.** 2015. Araport: an application platform for data discovery. *Concurrency and Computation: Practice and Experience* **27**, 4412-4422.
- Hare PD, Cress WA, van Staden J.** 2003. A regulatory role for proline metabolism in stimulating *Arabidopsis thaliana* seed germination. *Plant Growth Regulation* **39**, 41-50.
- He S, Schulthess AW, Mirdita V, Zhao Y, Korzun V, Bothe R, Ebmeyer E, Reif JC, Jiang Y.** 2016. Genomic selection in a commercial winter wheat population. *Theoretical and Applied Genetics* **129**, 641-651.
- Hill WG, Weir BS.** 1988. Variances and covariances of squared linkage disequilibria in finite populations. *Theoretical population biology* **33**, 54-78.
- Honkanen S, Jones VAS, Morieri G, Champion C, Hetherington AJ, Kelly S, Proust H, Saint-Marcoux D, Prescott H, Dolan L.** 2016. The mechanism forming the cell surface of tip-growing rooting cells is conserved among land plants. *Current Biology* **26**, 3238-3244.

- Honsdorf N, March TJ, Berger B, Tester M, Pillen K.** 2014. High-Throughput Phenotyping to Detect Drought Tolerance QTL in Wild Barley Introgression Lines. *PLoS ONE* **9**, e97047.
- Horton MW, Hancock AM, Huang YS, Toomajian C, Atwell S, Auton A, Mulyati NW, Platt A, Sperone FG, Vilhjálmsson BJ.** 2012. Genome-wide patterns of genetic variation in worldwide *Arabidopsis thaliana* accessions from the RegMap panel. *Nature Genetics* **44**, 212-216.
- Humplík JF, Lazár D, Fürst T, Husičková A, Hýbl M, Spíchal L.** 2015. Automated integrative high-throughput phenotyping of plant shoots: a case study of the cold-tolerance of pea (*Pisum sativum* L.). *Plant Methods* **11**, 20.
- Juenger T, Pérez-Pérez JM, Bernal S, Micol JL.** 2005. Quantitative trait loci mapping of floral and leaf morphology traits in *Arabidopsis thaliana*: evidence for modular genetic architecture. *Evolution & Development* **7**, 259-271.
- Junker A, Muraya MM, Weigelt-Fischer K, Arana-Ceballos F, Klukas C, Melchinger AE, Meyer RC, Riewe D, Altmann T.** 2015. Optimizing experimental procedures for quantitative evaluation of crop plant performance in high throughput phenotyping systems. *Frontiers in Plant Science* **5**, 770.
- Kim S, Plagnol V, Hu TT, Toomajian C, Clark RM, Ossowski S, Ecker JR, Weigel D, Nordborg M.** 2007. Recombination and linkage disequilibrium in *Arabidopsis thaliana*. *Nature Genetics* **39**, 1151-1155.
- Kjaer HK, Ottosen C-O.** 2015. 3D Laser Triangulation for Plant Phenotyping in Challenging Environments. *Sensors* **15**, 13533-13547.
- Klepikova AV, Kasianov AS, Gerasimov ES, Logacheva MD, Penin AA.** 2016. A high resolution map of the *Arabidopsis thaliana* developmental transcriptome based on RNA-seq profiling. *The Plant Journal* **88**, 1058-1070.
- Klukas C, Chen D, Pape J-M.** 2014. Integrated analysis platform: an open-source information system for high-throughput plant phenotyping. *Plant Physiology* **165**, 506-518.
- Knoch D, Abadi A, Grandke F, Meyer RC, Samans B, Werner CR, Snowdon RJ, Altmann T.** 2020. Strong temporal dynamics of QTL action on plant growth progression revealed through high-throughput phenotyping in canola. *Plant Biotechnology Journal* **18**, 68-82.
- Knoch D, Riewe D, Meyer RC, Boudichevskaia A, Schmidt R, Altmann T.** 2017. Genetic dissection of metabolite variation in *Arabidopsis* seeds: evidence for mQTL hotspots and a master regulatory locus of seed metabolism. *Journal of Experimental Botany* **68**, 1655-1667.

- Krishnakumar V, Hanlon MR, Contrino S, Ferlanti ES, Karamycheva S, Kim M, Rosen BD, Cheng C-Y, Moreira W, Mock SA, Stubbs J, Sullivan JM, Krampis K, Miller JR, Micklem G, Vaughn M, Town CD.** 2015. Araport: the Arabidopsis Information Portal. *Nucleic Acids Research* **43**, D1003-D1009.
- Kuhlmann M, Meyer RC, Jia Z, Klose D, Krieg L-M, von Wirén N, Altmann T.** 2020. Epigenetic Variation at a Genomic Locus Affecting Biomass Accumulation under Low Nitrogen in *Arabidopsis thaliana*. *Agronomy* **10**, 636.
- Lee S-j, Kang J-y, Kim SY.** 2009. An ARIA-interacting AP2 domain protein is a novel component of ABA signaling. *Molecules and cells* **27**, 409-416.
- Lefebvre V, Fortabat M-N, Ducamp A, North HM, Maia-Grondard A, Trouverie J, Boursiac Y, Mouille G, Durand-Tardif M.** 2011. *ESKIMO1* disruption in Arabidopsis alters vascular tissue and impairs water transport. *PLoS ONE* **6**, e16645.
- Leister D, Varotto C, Pesaresi P, Niwergall A, Salamini F.** 1999. Large-scale evaluation of plant growth in *Arabidopsis thaliana* by non-invasive image analysis. *Plant Physiology and Biochemistry* **37**, 671-678.
- Liang C, Liu X, Sun Y, Yiu S-M, Lim BL.** 2014. Global small RNA analysis in fast-growing *Arabidopsis thaliana* with elevated concentrations of ATP and sugars. *BMC Genomics* **15**, 116.
- Lipka AE, Tian F, Wang Q, Peiffer J, Li M, Bradbury PJ, Gore MA, Buckler ES, Zhang Z.** 2012. GAPIT: genome association and prediction integrated tool. *Bioinformatics* **28**, 2397-2399.
- Lisec J, Meyer RC, Steinfath M, Redestig H, Becher M, Witucka-Wall H, Fiehn O, Törjék O, Selbig J, Altmann T, Willmitzer L.** 2008. Identification of metabolic and biomass QTL in *Arabidopsis thaliana* in a parallel analysis of RIL and IL populations. *Plant Journal* **53**, 960-972.
- Liu W, Gowda M, Reif JC, Hahn V, Ruckelshausen A, Weissmann EA, Maurer HP, Würschum T.** 2014. Genetic dynamics underlying phenotypic development of biomass yield in triticale. *BMC Genomics* **15**, 458.
- Liu X, Huang M, Fan B, Buckler ES, Zhang Z.** 2016. Iterative usage of fixed and random effect models for powerful and efficient genome-wide association studies. *PLoS Genetics* **12**, e1005767.
- Loudet O, Gaudon V, Trubuil A, Daniel-Vedele F.** 2005. Quantitative trait loci controlling root growth and architecture in *Arabidopsis thaliana* confirmed by heterogeneous inbred family. *Theoretical and Applied Genetics* **110**, 742-753.

- Lowe LB, Ayers GS, Ries SK.** 1972. Relationship of Seed Protein and Amino Acid Composition to Seedling Vigor and Yield of Wheat. *Agronomy Journal* **64**, 608-611.
- Lyu JIL, Baek SH, Jung S, Chu H, Nam HG, Kim J, Lim PO.** 2017. High-Throughput and Computational Study of Leaf Senescence through a Phenomic Approach. *Frontiers in Plant Science* **8**, 250.
- Marchadier E, Hanemian M, Tisné S, Bach L, Bazakos C, Gilbault E, Haddadi P, Virilouvet L, Loudet O.** 2019. The complex genetic architecture of shoot growth natural variation in *Arabidopsis thaliana*. *PLoS Genetics* **15**.
- Marroni F, Pinosio S, Zaina G, Fogolari F, Felice N, Cattonaro F, Morgante M.** 2011. Nucleotide diversity and linkage disequilibrium in *Populus nigra* cinnamyl alcohol dehydrogenase (*CAD4*) gene. *Tree genetics & genomes* **7**, 1011-1023.
- Martin RC, Asahina M, Liu P-P, Kristof JR, Coppersmith JL, Pluskota WE, Bassel GW, Goloviznina NA, Nguyen TT, Martínez-Andújar C, Arun Kumar MB, Pupel P, Nonogaki H.** 2010. The microRNA156 and microRNA172 gene regulation cascades at post-germinative stages in *Arabidopsis*. *Seed Science Research* **20**, 79-87.
- Massonnet C, Vile D, Fabre J, Hannah MA, Caldana C, Lisek J, Beemster GTS, Meyer RC, Messerli G, Gronlund JT, Perkovic J, Wigmore E, May S, Bevan MW, Meyer C, Rubio-Díaz S, Weigel D, Micol JL, Buchanan-Wollaston V, Fiorani F, Walsh S, Rinn B, Gruissem W, Hilson P, Hennig L, Willmitzer L, Granier C.** 2010. Probing the Reproducibility of Leaf Growth and Molecular Phenotypes: A Comparison of Three *Arabidopsis* Accessions Cultivated in Ten Laboratories. *Plant Physiology* **152**, 2142-2157.
- Menz J, Li Z, Schulze WX, Ludewig U.** 2016. Early nitrogen deprivation responses in *Arabidopsis* roots reveal distinct differences on transcriptome and (phospho) proteome levels between nitrate and ammonium nutrition. *Plant Journal* **88**, 717-734.
- Meyer RC, Kusterer B, Lisek J, Steinfath M, Becher M, Scharr H, Melchinger AE, Selbig J, Schurr U, Willmitzer L, Altmann T.** 2010. QTL analysis of early stage heterosis for biomass in *Arabidopsis*. *Theoretical and Applied Genetics* **120**, 227-237.
- Meyer RC, Törjék O, Becher M, Altmann T.** 2004. Heterosis of biomass production in *Arabidopsis*. Establishment during early development. *Plant Physiology* **134**, 1813-1823.
- Meyer RC, Witucka-Wall H, Becher M, Blacha A, Boudichevskaia A, Dörmann P, Fiehn O, Friedel S, von Korff M, Lisek J, Melzer M, Repsilber D, Schmidt R, Scholz M, Selbig J, Willmitzer L, Altmann T.** 2012. Heterosis manifestation during early *Arabidopsis* seedling development is characterized by intermediate gene expression and enhanced metabolic activity in the hybrids. *The Plant Journal* **71**, 669-683.

- Miedaner T, Haffke S, Siekmann D, Fromme FJ, Roux SR, Hackauf B.** 2018. Dynamic quantitative trait loci (QTL) for plant height predict biomass yield in hybrid rye (*Secale cereale* L.). *Biomass and Bioenergy* **115**, 10-18.
- Muraya MM, Chu J, Zhao Y, Junker A, Klukas C, Reif JC, Altmann T.** 2017. Genetic variation of growth dynamics in maize (*Zea mays* L.) revealed through automated non-invasive phenotyping. *Plant Journal* **89**, 366-380.
- Muscolo A, Junker A, Klukas C, Weigelt-Fischer K, Riewe D, Altmann T.** 2015. Phenotypic and metabolic responses to drought and salinity of four contrasting lentil accessions. *Journal of Experimental Botany* **66**, 5467-5480.
- Neumann K, Klukas C, Friedel S, Rischbeck P, Chen D, Entzian A, Stein N, Graner A, Kilian B.** 2015. Dissecting spatiotemporal biomass accumulation in barley under different water regimes using high-throughput image analysis. *Plant, Cell & Environment* **38**, 1980-1996.
- Neumann K, Zhao Y, Chu J, Keilwagen J, Reif JC, Kilian B, Graner A.** 2017. Genetic architecture and temporal patterns of biomass accumulation in spring barley revealed by image analysis. *BMC Plant Biology* **17**, 137.
- Nguyen HH, Lee MH, Song K, Ahn G, Lee J, Hwang I.** 2018. The A/ENTH domain-containing protein AtECA4 is an adaptor protein involved in cargo recycling from the trans-Golgi network/early endosome to the plasma membrane. *Molecular Plant* **11**, 568-583.
- Nguyen T-P, Keizer P, van Eeuwijk F, Smeekens S, Bentsink L.** 2012. Natural Variation for Seed Longevity and Seed Dormancy Are Negatively Correlated in Arabidopsis. *Plant Physiology* **160**, 2083-2092.
- Park J, Oh D-H, Dassanayake M, Nguyen KT, Ogas J, Choi G, Sun T-p.** 2017. Gibberellin signaling requires chromatin remodeler PICKLE to promote vegetative growth and phase transitions. *Plant Physiology* **173**, 1463-1474.
- Pham A-T, Maurer A, Pillen K, Brien C, Dowling K, Berger B, Eglinton JK, March TJ.** 2019. Genome-wide association of barley plant growth under drought stress using a nested association mapping population. *BMC Plant Biology* **19**, 134.
- Pommerrenig B, Junker A, Abreu I, Bieber A, Fuge J, Willner E, Bienert MD, Altmann T, Bienert GP.** 2018. Identification of Rapeseed (*Brassica napus*) Cultivars with a High Tolerance to Boron-Deficient Conditions. *Frontiers in Plant Science* **9**, 1142.
- Pritchard JK, Stephens M, Donnelly P.** 2000. Inference of Population Structure Using Multilocus Genotype Data. *Genetics* **155**, 945-959.



**R Core Team** (2018) *R: A Language and Environment for Statistical Computing*, Vienna, Austria. R Foundation for Statistical Computing. Available at: <http://www.R-project.org/>.

**Remington DL, Thornsberry JM, Matsuoka Y, Wilson LM, Whitt SR, Doebley J, Kresovich S, Goodman MM, Buckler ES.** 2001. Structure of linkage disequilibrium and phenotypic associations in the maize genome. *Proceedings of the National Academy of Sciences of the United States of America* **98**, 11479-11484.

**Ren T, Hu Y, Tang Y, Li C, Yan B, Ren Z, Tan F, Tang Z, Fu S, Li Z.** 2018. Utilization of a Wheat55K SNP array for mapping of major QTL for temporal expression of the tiller number. *Frontiers in Plant Science* **9**, 333.

**Riewe D, Jeon HJ, Lisek J, Heuermann MC, Schmeichel J, Seyfarth M, Meyer RC, Willmitzer L, Altmann T.** 2016. A naturally occurring promoter polymorphism of the *Arabidopsis FUM2* gene causes expression variation, and is associated with metabolic and growth traits. *Plant Journal* **88**, 826-838.

**Rosen BD, Cheng C-Y, Town CD, Ferlanti ES, Miller JR, Krampis K, Kim M, Karamycheva S, Krishnakumar V, Stubbs J, Vaughn M, Hanlon MR, Mock SA, Moreira W, Micklem G, Sullivan JM, Contrino S.** 2014. Araport: the *Arabidopsis* Information Portal. *Nucleic Acids Research* **43**, D1003-D1009.

**Rosenberg NA, Burke T, Elo K, Feldman MW, Freidlin PJ, Groenen MAM, Hillel J, Mäki-Tanila A, Tixier-Boichard M, Vignal A.** 2001. Empirical evaluation of genetic clustering methods using multilocus genotypes from 20 chicken breeds. *Genetics* **159**, 699-713.

**Sasaki E, Frommlet F, Nordborg M.** 2018. GWAS with heterogeneous data: estimating the fraction of phenotypic variation mediated by gene expression data. *G3: Genes, Genomes, Genetics* **8**, 3059-3068.

**Sasidharan R, Chinnappa CC, Staal M, Elzenga JTM, Yokoyama R, Nishitani K, Voesenek LACJ, Pierik R.** 2010. Light quality-mediated petiole elongation in *Arabidopsis* during shade avoidance involves cell wall modification by xyloglucan endotransglucosylase/hydrolases. *Plant Physiology* **154**, 978-990.

**Schilling S, Gramzow L, Lobbes D, Kirbis A, Weilandt L, Hoffmeier A, Junker A, Weigelt-Fischer K, Klukas C, Wu F, Meng Z, Altmann T, Theißen G.** 2015. Non-canonical structure, function and phylogeny of the  $B_{\text{sister}}$  MADS-box gene *OsMADS30* of rice (*Oryza sativa*). *Plant Journal* **84**, 1059-1072.

**Schippers JHM.** 2015. Transcriptional networks in leaf senescence. *Current Opinion in Plant Biology* **27**, 77-83.

- Seguela-Arnaud M, Smith C, Uribe MC, May S, Fischl H, McKenzie N, Bevan MW.** 2015. The Mediator complex subunits MED25/PFT1 and MED8 are required for transcriptional responses to changes in cell wall arabinose composition and glucose treatment in *Arabidopsis thaliana*. *BMC Plant Biology* **15**, 215.
- Shin J-H, Blay S, McNeney B, Graham J.** 2006. LDheatmap: an R function for graphical display of pairwise linkage disequilibria between single nucleotide polymorphisms. *Journal of Statistical Software* **16**, 1-10.
- Silva AT, Ribone PA, Chan RL, Ligterink W, Hilhorst HWM.** 2016. A predictive coexpression network identifies novel genes controlling the seed-to-seedling phase transition in *Arabidopsis thaliana*. *Plant Physiology* **170**, 2218-2231.
- Srikanth A, Schmid M.** 2011. Regulation of flowering time: all roads lead to Rome. *Cellular and molecular life sciences* **68**, 2013-2037.
- Stucky DF, Arpin JC, Schrick K.** 2014. Functional diversification of two UGT80 enzymes required for steryl glucoside synthesis in *Arabidopsis*. *Journal of Experimental Botany* **66**, 189-201.
- Sun X, Shantharaj D, Kang X, Ni M.** 2010. Transcriptional and hormonal signaling control of *Arabidopsis* seed development. *Current Opinion in Plant Biology* **13**, 611-620.
- Tang Y, Liu X, Wang J, Li M, Wang Q, Tian F, Su Z, Pan Y, Liu D, Lipka AE, Buckler ES, Zhang Z.** 2016. GAPIT Version 2: An Enhanced Integrated Tool for Genomic Association and Prediction. *The Plant Genome* **9**.
- Tisné S, Reymond M, Vile D, Fabre J, Dauzat M, Koornneef M, Granier C.** 2008. Combined genetic and modeling approaches reveal that epidermal cell area and number in leaves are controlled by leaf and plant developmental processes in *Arabidopsis*. *Plant Physiology* **148**, 1117-1127.
- Tisné S, Serrand Y, Bach L, Gilbault E, Ben Ameer R, Balasse H, Voisin R, Bouchez D, Durand-Tardif M, Guerche P, Chareyron G, Da Rugna J, Camilleri C, Loudet O.** 2013. Phenoscope: an automated large-scale phenotyping platform offering high spatial homogeneity. *Plant Journal* **74**, 534-544.
- Todesco M, Balasubramanian S, Hu TT, Traw MB, Horton M, Epple P, Kuhns C, Sureshkumar S, Schwartz C, Lanz C, Laitinen RAE, Huang Y, Chory J, Lipka V, Borevitz JO, Dangl JL, Bergelson J, Nordborg M, Weigel D.** 2010. Natural allelic variation underlying a major fitness trade-off in *Arabidopsis thaliana*. *Nature* **465**, 632-636.
- Wang H, Shabala L, Zhou M, Shabala S.** 2019a. Developing a high-throughput phenotyping method for oxidative stress tolerance in barley roots. *Plant Methods* **15**, 12.

- Wang X, Wang H, Long Y, Liu L, Zhao Y, Tian J, Zhao W, Li B, Chen L, Chao H, Li M.** 2015. Dynamic and comparative QTL analysis for plant height in different developmental stages of *Brassica napus* L. *Theoretical and Applied Genetics* **128**, 1175-1192.
- Wang X, Zhang R, Song W, Han L, Liu X, Sun X, Luo M, Chen K, Zhang Y, Yang H, Yang G, Zhao Y, Zhao J.** 2019b. Dynamic plant height QTL revealed in maize through remote sensing phenotyping using a high-throughput unmanned aerial vehicle (UAV). *Scientific Reports* **9**, 3458.
- Weber H, Hellmann H.** 2009. *Arabidopsis thaliana* BTB/POZ-MATH proteins interact with members of the ERF/AP2 transcription factor family. *The FEBS journal* **276**, 6624-6635.
- Wellmer F, Riechmann JL.** 2010. Gene networks controlling the initiation of flower development. *Trends in Genetics* **26**, 519-527.
- Weng J-K, Ye M, Li B, Noel JP.** 2016. Co-evolution of Hormone Metabolism and Signaling Networks Expands Plant Adaptive Plasticity. *Cell* **166**, 881-893.
- Winter D, Vinegar B, Nahal H, Ammar R, Wilson GV, Provart NJ.** 2007. An 'Electronic Fluorescent Pictograph' browser for exploring and analyzing large-scale biological data sets. *PLoS ONE* **2**, e718.
- Wu D, Guo Z, Ye J, Feng H, Liu J, Chen G, Zheng J, Yan D, Yang X, Xiong X, Liu Q, Niu Z, Gay AP, Doonan JH, Xiong L, Yang W.** 2018. Combining high-throughput micro-CT-RGB phenotyping and genome-wide association study to dissect the genetic architecture of tiller growth in rice. *Journal of Experimental Botany* **70**, 545-561.
- Würschum T, Liu W, Busemeyer L, Tucker MR, Reif JC, Weissmann EA, Hahn V, Ruckelshausen A, Maurer HP.** 2014. Mapping dynamic QTL for plant height in triticale. *BMC Genetics* **15**, 59.
- Xiong G, Cheng K, Pauly M.** 2013. Xylan *O*-Acetylation Impacts Xylem Development and Enzymatic Recalcitrance as Indicated by the *Arabidopsis* Mutant *tbl29*. *Molecular Plant* **6**, 1373-1375.
- Xu R, Li Y.** 2011. Control of final organ size by Mediator complex subunit 25 in *Arabidopsis thaliana*. *Development* **138**, 4545-4554.
- Yang J, Zhang N, Ma C, Qu Y, Si H, Wang D.** 2013. Prediction and verification of microRNAs related to proline accumulation under drought stress in potato. *Computational Biology and Chemistry* **46**, 48-54.
- Zhang X, Huang C, Wu D, Qiao F, Li W, Duan L, Wang K, Xiao Y, Chen G, Liu Q.** 2017. High-throughput phenotyping and QTL mapping reveals the genetic architecture of maize plant growth. *Plant Physiology* **173**, 1554-1564.

**Zhu J.** 1995. Analysis of conditional genetic effects and variance components in developmental genetics. *Genetics* **141**, 1633-1639.

## TABLES

Table 1: Co-localisation of detected MTAs with known growth, metabolite and flowering time QTL

| MTA Locus | trait            | SNP marker  | Chr. | position   | p-value <sub>(FDR)</sub> | LOD   | norm.effect % | PVE%  | reference         |
|-----------|------------------|-------------|------|------------|--------------------------|-------|---------------|-------|-------------------|
| 1-04      | RGR16_18         | M1_30345995 | 1    | 30,345,995 | 2.67E-02                 |       | 3.713         | 0.90  |                   |
|           | Asparagine       |             | 1    | 30,348,203 |                          | 3.86  | -1.0661       | 9.46  | Knoch 2017        |
|           | Threonic acid    |             | 1    | 30,348,203 |                          | 7.18  | -5.1204       | 29.57 | Knoch 2017        |
|           | Unknown MST 102  | MASC09206   | 1    | 30,348,203 |                          | 2.59  | -0.0450       | 3.19  | Knoch 2017        |
|           | Unknown MST 244  |             | 1    | 30,348,203 |                          | 6.19  | -1.0550       | 11.98 | Knoch 2017        |
| 1-05      | RGR09-11         | M1_8974266  | 1    | 8,974,266  | 1.69E-02                 |       |               | 2.26  |                   |
|           | flowering        | AT1G25540   | 1    | 8,974,815  |                          |       |               |       | Cerdán 2003       |
| 2-06      | RGR07_09         | M2_11691472 | 2    | 11,691,472 | 4.49E-02                 |       | 1.090         | 1.26  |                   |
|           | Asparagine       |             | 2    | 11,696,472 |                          | 3.34  | 0.9462        | 3.12  | Knoch 2017        |
|           | Leucine          |             | 2    | 11,696,472 |                          | 5.29  | 0.0001        | 4.78  | Knoch 2017        |
|           | Unknown MST 187  | nga1126     | 2    | 11,696,472 |                          | 10.53 | 4.3989        | 9.10  | Knoch 2017        |
|           | Unknown MST 205  |             | 2    | 11,696,472 |                          | 9.47  | 6.1418        | 8.80  | Knoch 2017        |
| 2-07      | DW20             | M2_19627477 | 2    | 19,627,477 | 2.56E-02                 |       | -2.953        | 2.407 |                   |
|           | Unknown MST 7    | MSAT2.22    | 2    | 19,625,983 |                          | 3.60  | -1.5678       | 4.038 | Knoch 2017        |
| 3-08      | PLA15            | M3_6754875  | 3    | 6,754,875  | 2.56E-02                 |       |               | 3.012 |                   |
|           | flowering        | AT3G19500   | 3    | 6,759,016  |                          |       |               |       | Sasaki 2018       |
|           | PLA18 (PLA22-24) | marker      | 3    | 6,751,136  |                          | 5.11  |               |       | Bac-Molenaar 2015 |
| 4-08      | PLA18            | M4_00143220 | 4    | 143,220    | 4.29E-02                 |       | 2.009         | 1.50  |                   |
|           | PLA06 per se     | MASC07015   | 4    | 146,029    |                          | 2.32  | -0.1500       | 2.47  | Meyer 2010        |
| 5-01      | Fucose           | MASC04860   | 5    | 1,193,462  |                          | 6.79  | -3.4840       | 5.90  | Knoch 2017        |
|           | Proline          |             |      |            |                          | 5.51  | -2.5479       | 5.73  | Knoch 2017        |

|                   |             |   |           |          |         |      |            |
|-------------------|-------------|---|-----------|----------|---------|------|------------|
| Unknown MST 6     |             |   |           | 6.57     | 0.3066  | 5.16 | Knoch 2017 |
| Unknown MST 79    |             |   |           | 2.58     | -0.4391 | 2.89 | Knoch 2017 |
| Hexacosanoic acid |             |   |           |          |         |      | Lisec 2008 |
| Phosphate         |             |   |           |          |         |      | Lisec 2008 |
| unknown_092       |             |   |           |          |         |      | Lisec 2008 |
| PLA13             |             |   |           | 3.14E-02 | -5.311  | 1.80 |            |
| PLA14             |             |   |           | 1.22E-03 | -6.388  | 2.61 |            |
| PLA15             |             |   |           | 5.17E-06 | -7.548  | 3.36 |            |
| PLA16             | M5_01196098 | 5 | 1,196,098 | 4.47E-03 | -5.662  | 3.84 |            |
| PLA18             |             |   |           | 2.36E-04 | -4.811  | 3.54 |            |
| DW20              |             |   |           | 3.60E-07 | -7.710  | 6.14 |            |

MTA: marker trait association; Chr: chromosome;  $p\text{-value}_{(FDR)}$ : FDR adjusted  $p$ -values, with FDR threshold set to 0.05; LOD: LOD score (measure of probability) of QTL taken from references; norm.effect %: normalised effect in %; PVE%: percentage of phenotypic variation explained by the MTA.

Table 2: List of candidate genes for growth-related trait variation

| MTA Locus | trait     | stage         | gene      | name                                           | symbol  | annotation                                | expression in                                     |
|-----------|-----------|---------------|-----------|------------------------------------------------|---------|-------------------------------------------|---------------------------------------------------|
| 1-01      | PLA       | 10-13         | AT1G07670 | endomembrane-type CA-ATPase 4                  | ECA4    | regulation of ABA and BL levels           | germinating seed, seedling root                   |
| 1-03      | RGR       | 8-11          | AT1G60790 | trichome birefringence-like protein (DUF828)   | TBL2    | cell wall organization or biogenesis      | seedling, young leaves                            |
| 1-06      | SA<br>RGR | seed<br>10-12 | AT1G16060 | ARIA-interacting double AP2 domain protein     | WRI3    | involved in regulating seedling growth.   | flower, petiole mature leaf                       |
| 3-01      | RGR       | 15-18         | AT3G07020 | UDP-Glycosyltransferase superfamily protein    | UGT80A2 | lipid glycosylation; reduced seed size    | root, leaves, stem, flower                        |
|           |           |               | AT3G07030 | ALBA DNA/RNA-binding protein                   | ALBA    | nucleic acid binding                      | stem, root, mature leaves                         |
| 3-04      | RGR       | 15-17         | AT3G23730 | xyloglucan endotransglucosylase/hydrolase 16   | XTH16   | cell wall modification                    | germinating seed, root apex, young leaves, flower |
| 3-07      | PLA       | 12-20         | AT3G49380 | plant-specific IQD family                      | IQD15   | CaM-dependent Ca <sup>2+</sup> signalling | seedling root, root, maturing seed                |
|           |           |               | AT3G49390 | CTC-interacting domain 10                      | CID10   | RNA-binding protein RBP37                 | seedling root, root, leaves, maturing seed        |
| 4-03      | PLA       | 14-15         | AT4G13620 | Integrase-type DNA-binding superfamily protein | ERF062  | transcription regulation                  | seedling root, root                               |

List of the nine most promising candidate genes indicating the relevant MTA locus, the associated trait (PLA: projected leaf area, RGR: relative growth rate, SA: seed area) and stage (as time period given in days after sowing). The expression is derived from the eFP Browser Klepikova Atlas (Klepikova *et al.*, 2016; Winter *et al.*, 2007).

## FIGURE LEGENDS

Figure 1: SNP density plot illustrating even SNP distribution across the genome

Shown is the genome-wide SNP marker distribution across the five Arabidopsis chromosomes. 212,142 unique, single-copy SNPs were binned in 10 kb intervals. The marker density is indicated by the colour legend (green to red) on the right side. Grey colour indicates regions without SNPs.

Figure 2: Correlation heatmap and hierarchical clustering of phenotypic means

Correlation heatmap and hierarchical cluster analysis of adjusted means of endpoint biomass (DW20), projected leaf area (PLA) and relative growth rates (RGR) over time, as well as seed area (SA), seed length (SL) and seed width (SW). The lower triangle displays the coefficients ( $r$ ), the upper triangle the statistical significance ( $p$ -values). Colour scale for  $r$ : red, high correlation; blue, low correlation. Hierarchical clustering: colour differences in sidebars indicate the different trait groups within the clusters.

Figure 3: Dynamic MTAs for projected leaf area

Probabilities of 15 dynamic marker trait associations (MTA) (a) for projected leaf area over time (days after sowing, DAS), with normalised effects (b). The sign of the allelic effect is determined by the alphabetic order of the respective nucleotides of the SNP marker: a positive sign refers to the second allele in alphabetic order. The horizontal line indicates the significance threshold corresponding to  $p\text{-value}_{(\text{FDR})} < 0.05$ . Also shown are co-localised MTAs for endpoint biomass (DW20) and relative growth rate between 15-17 DAS (RGR15-17). Different MTAs are represented by different colours, see legend. (Colours across figures 3 and 4 are not comparable)

Figure 4: Dynamic QTL for relative growth rates

Probabilities for six dynamic marker trait associations (MTA) (a) for relative growth rates over time (days after sowing, DAS), with normalised effects (b). The sign of the allelic effect is determined by the alphabetic order of the respective nucleotides of the SNP marker: a positive sign refers to the second allele in alphabetic order. The horizontal line indicates the significance threshold corresponding to  $p\text{-value}_{(\text{FDR})} < 0.05$ . Also shown is a co-localised MTA for projected leaf area at 12 DAS (PLA12). Different MTAs are represented by different colours, see legend. (Colours across figures 3 and 4 are not comparable)



## FIGURES

Figure 1: SNP density plot illustrating even SNP marker distribution across the *Arabidopsis thaliana* genome

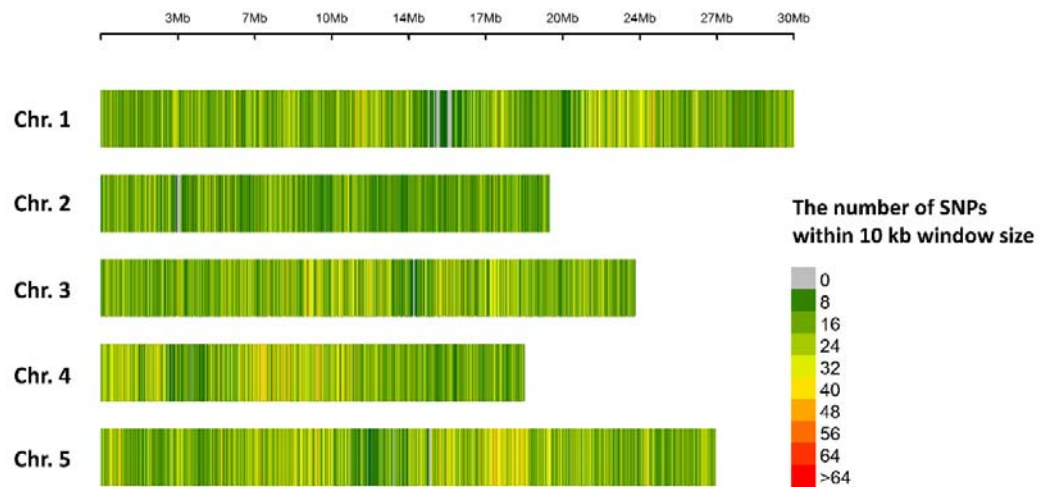



Figure 3: Dynamic MTAs for projected leaf area

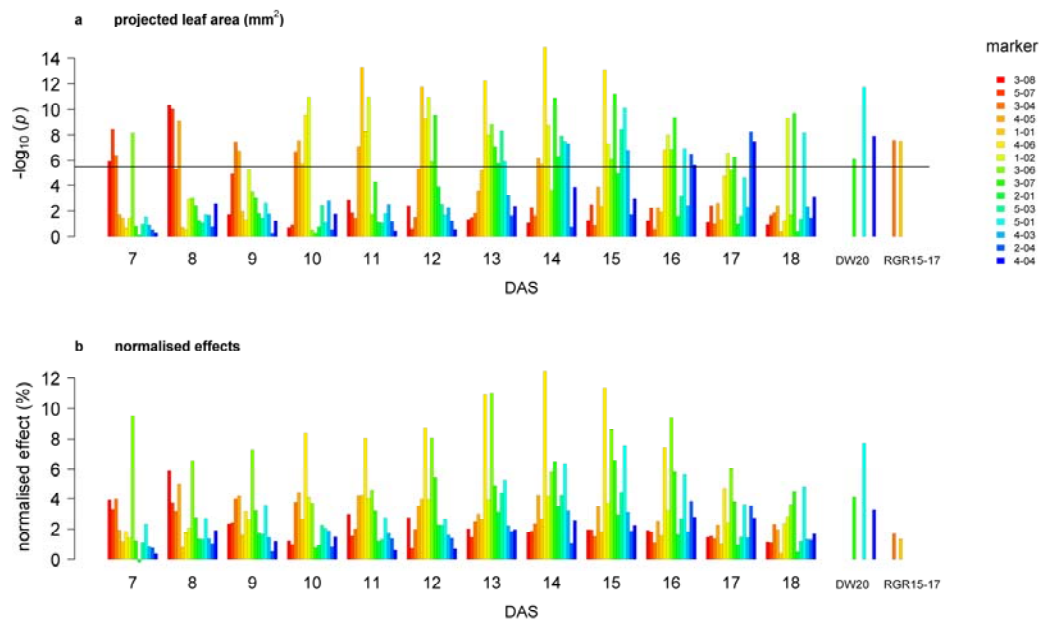

Figure 4: Dynamic MTAs for relative growth rates

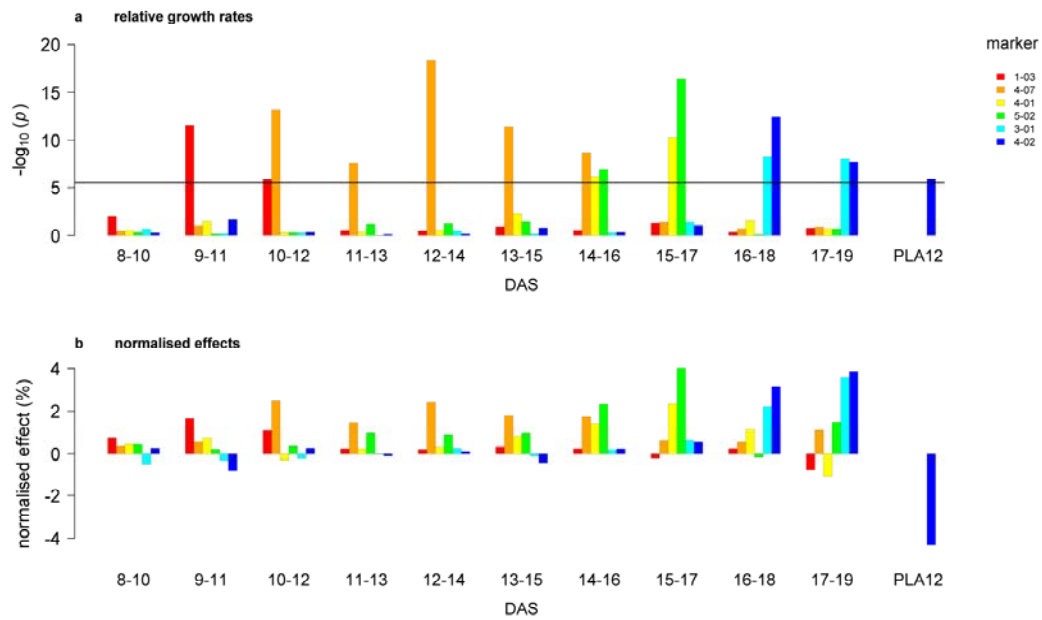

Source: https://www.biorxiv.org/content/10.1101/2020.06.11.145953v2.full.pdf
